# Supplementary material for: Use of Analytic Hierarchy Process Method to Identify Potential Rainwater Harvesting Sites: Design and Financial Strategies in Taxco de Alarcón, Southern Mexico
Source: MDPI journal article supplement (doi:10.3390/su15108220), 2023-05-18
Supplement: s1 [file s1]

**Table S1:** Physicochemical parameters (average, minimum and maximum) measured at the sampling sites, evaluated in accordance with NOM-SSA-127-2021 [53]. pH: potential of hydrogen in units. Fecal coliform: colony forming units (CFU/100 ml)).

| NOM-127        | pH      | Fecal coliform | NO <sub>3</sub> <sup>-</sup> | SO <sub>4</sub> <sup>2-</sup> | Cl <sup>-</sup> | Na    | Mg   | Ca    | K     | Fe   | Mn    | Al   |
|----------------|---------|----------------|------------------------------|-------------------------------|-----------------|-------|------|-------|-------|------|-------|------|
| mg/L           |         |                |                              |                               |                 |       |      |       |       |      |       |      |
| Limits         | 6.5-8.5 | Absent         | 11                           | 400                           | 250             | 200   | -    | -     | -     | 0.3  | 0.15  | 0.2  |
| Pilita         |         |                |                              |                               |                 |       |      |       |       |      |       |      |
| Maximum        | 7       | Absent         | 1.04                         | 5.29                          | 3.36            | 0.31  | 0.06 | 2.12  | 0.15  | 0.03 | 0.002 | 0.01 |
| Minimum        | 7       | Absent         | 0.5                          | 0.69                          | 0.28            | 0.05  | 0.04 | 0.45  | 0.08  | 0.01 | 0.001 | 0.01 |
| Average        | 7       | Absent         | 0.8                          | 2.74                          | 1.82            | 0.19  | 0.05 | 1.04  | 0.115 | 0.02 | 0.001 | 0.01 |
| Casallas       |         |                |                              |                               |                 |       |      |       |       |      |       |      |
| Maximum        | 7       | Absent         | 1.46                         | 1.96                          | 1               | 0.17  | 0.02 | 0.75  | 0.26  | 0.01 | 0.003 | 0.01 |
| Minimum        | 7       | Absent         | 0.37                         | 0.85                          | 0.28            | 0.12  | 0.02 | 0.36  | 0.15  | 0.01 | 0.002 | 0.01 |
| Average        | 7       | Absent         | 0.86                         | 1.52                          | 0.54            | 0.15  | 0.02 | 0.54  | 0.21  | 0.01 | 0.002 | 0.01 |
| Agua Blanca    |         |                |                              |                               |                 |       |      |       |       |      |       |      |
| Maximum        | 7       | Absent         | 1.52                         | 3.97                          | 1.09            | 2.78  | 0.11 | 41.08 | 0.53  | 0.51 | 0.002 | 0.01 |
| Minimum        | 7       | Absent         | 0.43                         | 1.1                           | 0.41            | 0.09  | 0.05 | 0.51  | 0.1   | 0.01 | 0.002 | 0.01 |
| Average        | 7       | Absent         | 1.06                         | 2.45                          | 0.72            | 1.06  | 0.08 | 14.07 | 0.32  | 0.26 | 0.002 | 0.01 |
| Taxco el Viejo |         |                |                              |                               |                 |       |      |       |       |      |       |      |
| Maximum        | 7       | Absent         | 1.5                          | 1.92                          | 2.95            | 1.8   | 0.11 | 1.6   | 2.03  | 0.02 | 0.003 | 0.02 |
| Minimum        | 7       | Absent         | 0.52                         | 0.5                           | 0.45            | 0.14  | 0.05 | 0.41  | 0.13  | 0.01 | 0.001 | 0.01 |
| Average        | 7       | Absent         | 0.92                         | 1.22                          | 1.7             | 0.82  | 0.08 | 0.92  | 0.87  | 0.02 | 0.002 | 0.02 |
| Acuitlapán     |         |                |                              |                               |                 |       |      |       |       |      |       |      |
| Maximum        | 7       | Absent         | 1.61                         | 1.57                          | 18.34           | 10.75 | 0.11 | 3.03  | 0.92  | 0.04 | 0.003 | 0.02 |
| Minimum        | 7       | Absent         | 0.32                         | 1.27                          | 0.3             | 0.15  | 0.08 | 0.73  | 0.2   | 0.01 | 0.002 | 0.02 |
| Average        | 7       | Absent         | 0.98                         | 1.38                          | 6.38            | 3.7   | 0.10 | 1.83  | 0.66  | 0.02 | 0.002 | 0.02 |
| Horconcito     |         |                |                              |                               |                 |       |      |       |       |      |       |      |
| Maximum        | 7       | Absent         | 1.55                         | 2.5                           | 24.64           | 20.81 | 0.06 | 5.28  | 14.03 | 0.01 | 0.003 | 0.02 |
| Minimum        | 7       | Absent         | 1.1                          | 1.31                          | 0.33            | 0.11  | 0.05 | 0.36  | 0.09  | 0    | 0.002 | 0    |
| Average        | 7       | Absent         | 1.27                         | 1.71                          | 12.49           | 7.06  | 0.06 | 2.09  | 7.06  | 0.01 | 0.003 | 0.01 |
